# Supplementary material
Source: Springer Nature journal article supplement (https://www.springermedizin.de/resource/supplementary/12936_2011_1918_MOESM2_ESM.pdf/9541982)
Supplement: MOESM2 [file 9541982]

# RELAPSES IN MALIGNANT TERTIAN MALARIA

WEEKS AFTER RECOVERY FROM PRIMARY ATTACK

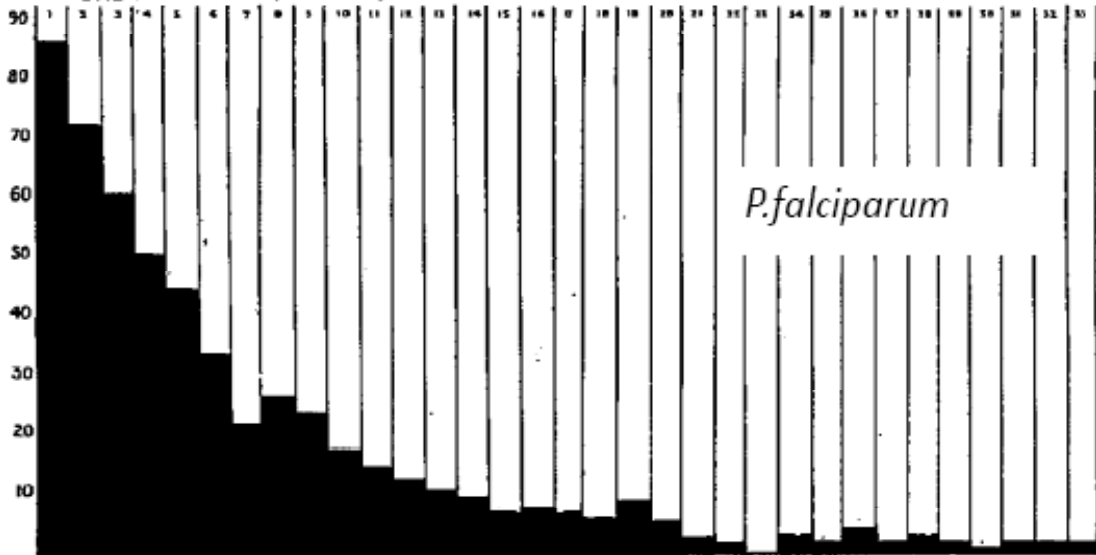

# RELAPSES IN BENIGN TERTIAN MALARIA

WEEKS AFTER RECOVERY FROM PRIMARY ATTACK

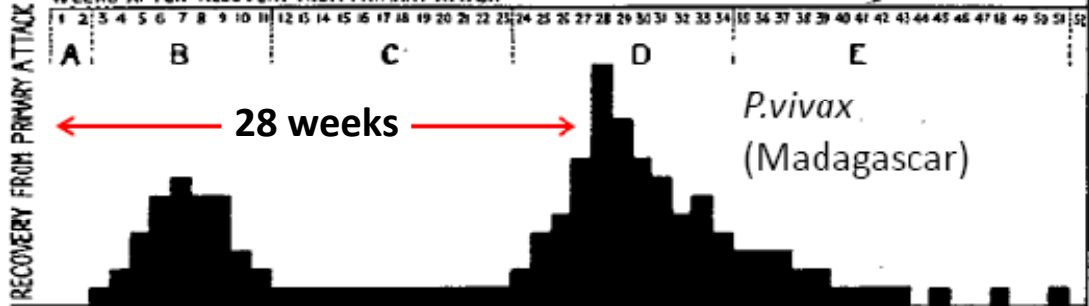

7 weeks
